# Supplementary material
Source: Springer Nature journal article supplement (https://www.springermedizin.de/resource/supplementary/12943_2009_574_MOESM18_ESM.pdf/9555012)

**A**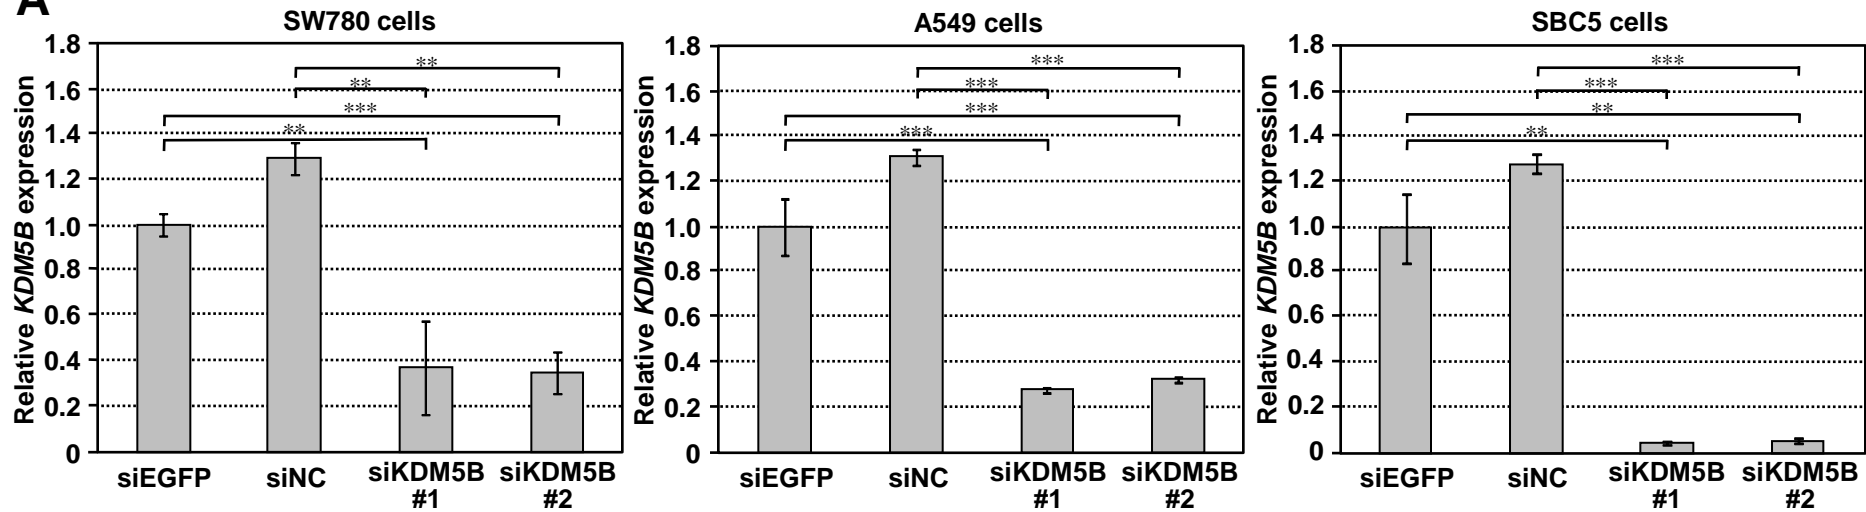**B**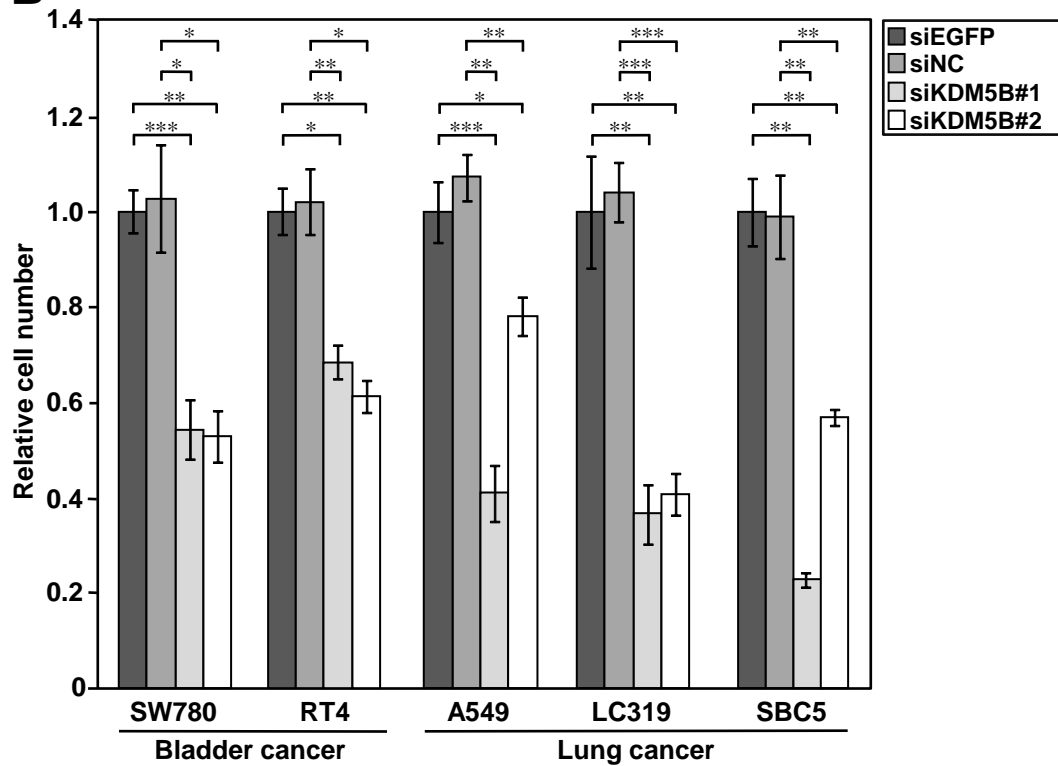**C**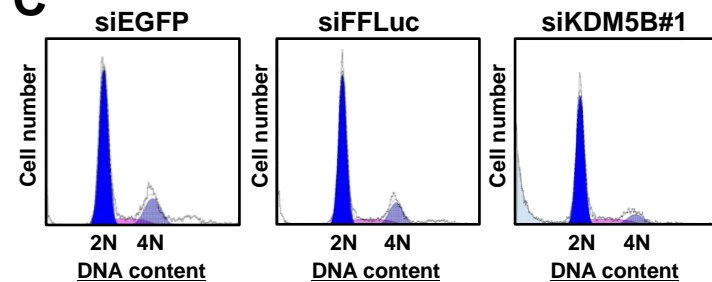**D**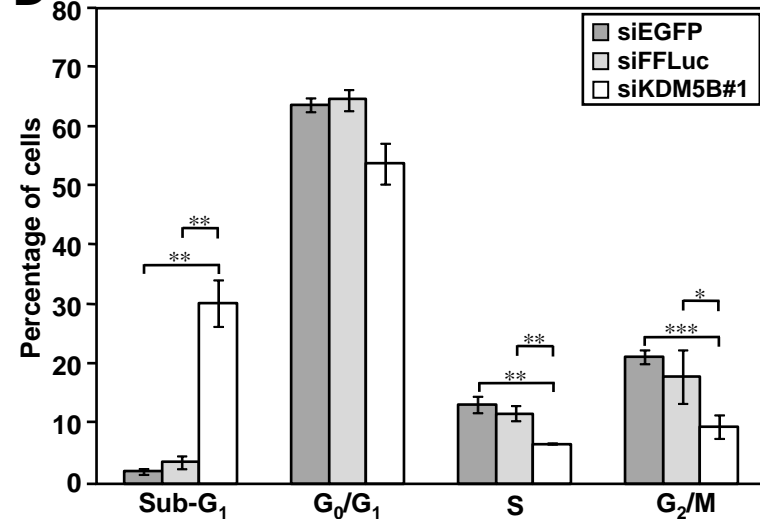

Supplement: MOESM18 [file 9555012]
